# Supplementary material for: Quality of life among perinatally HIV-affected and HIV-unaffected school-aged and adolescent Ugandan children: a multi-dimensional assessment of wellbeing in the post-HAART era
Source: Springer Nature journal article supplement (doi:10.1007/s11136-017-1597-2), 2017-05-22
Supplement: MOESM1 [file 12302772]

**Supplementary Tables**

| Table S1: Proxy-Reported Average Quality of Life Scores by Perinatal HIV Status in 6 – 18 years old Children from Kampala, Uganda | | | | | | | | | |
| --- | --- | --- | --- | --- | --- | --- | --- | --- | --- |
| QOL Domain/Scale | **Overall Score (100%)** | | **Perinatally HIV-infected** | | **Perinatally HIV- exposed uninfected** | | **Healthy unexposed uninfected** | | **P value** |
| Quality of Life Inventory Scale | **N** | **Mean (SD)** | **N** | **Mean (SD)** | **N** | **Mean (SD)** | **N** | **Mean (SD)** |  |
| Physical functioning subscale | 152 | 86.94 (15.86) | 52 | 78.97 (19.37) | 52 | 90.92 (13.28) | 48 | 91.28 (10.13) | <0.0001 |
| Emotional functioning subscale | 152 | 84.09 (16.58) | 52 | 78.14 (18.03) | 52 | 89.04 (14.95) | 48 | 85.16 (14.86) | 0.0027 |
| Social functioning subscale | 152 | 93.68 (13.08) | 52 | 90.96 (18.50) | 52 | 95.77 (8.99) | 48 | 94.37 (8.79) | 0.1569 |
| School functioning subscale | 143 | 80.35 (21.98) | 47 | 66.59 (25.41) | 48 | 86.46 (15.78) | 48 | 87.71 (17.19) | <0.0001 |
| Combined Quality of Life Score | 143 | 86.40 (13.73) | 47 | 78.83 (16.81) | 48 | 90.59 (10.24) | 48 | 89.63 (10.12) | <0.0001 |
| Multi-dimensional Vigor Scale |  |  |  |  |  |  |  |  |  |
| General vigor subscale | 160 | 78.91 (22.36) | 52 | 66.51 (24.48) | 56 | 84.30 (19.29) | 52 | 85.50 (18.01) | <0.0001 |
| Sleep vigor subscale | 162 | 89.84 (17.85) | 53 | 85.77 (16.55) | 57 | 92.69 (13.32) | 52 | 90.86 (14.08) | 0.0420 |
| Cognitive vigor subscale | 163 | 76.76 (26.16) | 54 | 66.43 (29.72) | 56 | 82.22 (20.70) | 53 | 81.52 (24.76) | 0.0015 |
| Multidimensional Vigor Score | 155 | 81.85 (17.85) | 48 | 72.57 (20.61) | 55 | 86.14 (14.53) | 52 | 85.90 (15.16) | <0.0001 |
| General Wellbeing Scale |  |  |  |  |  |  |  |  |  |
| Wellbeing Index | 159 | 81.92 (14.42) | 53 | 74.57 (11.13) | 54 | 85.18 (15.47) | 52 | 86.03 (13.57) | <0.0001 |
| Self-Rated Health | 161 | 54.29 (12.33) | 55 | 49.82 (13.26) | 54 | 58.52 (10.89) | 52 | 54.61 (11.28) | 0.0009 |
| Present Functioning Impairment | 163 | 17.76 (16.60) | 57 | 24.01 (20.03) | 53 | 12.71 (13.31) | 53 | 16.10 (13.31) | 0.0009 |
| General Cognitive Function | 149 | 78.58 (25.57) | 50 | 66.67 (30.81) | 53 | 85.53 (19.31) | 46 | 83.51(21.10) | 0.0002 |

Wellbeing Index: composite of respondent rating of index child’s feelings of happiness, good feelings about self, their current and future health, future positive outlook and extent of support received from family or friends

| **Table S2: Self-reported Average Quality of Life Score by Perinatal HIV Status in 6 – 18 years old Children from Kampala, Uganda** | | | | | | | | | | | | |
| --- | --- | --- | --- | --- | --- | --- | --- | --- | --- | --- | --- | --- |
| **QOL Domain/Scale** | **Overall Score (100%)** | | **Perinatally HIV-infected** | | **Perinatally HIV- exposed uninfected** | | **Healthy unexposed uninfected** | | | **P value** | | |
| **Quality of Life Inventory Scale** | **N** | **Mean (SD)** |  | **Mean (SD)** | **N** | **Mean (SD)** | | **N** | **Mean (SD)** | |  |
| Physical functioning subscale | 157 | 88.22 (14.80) | 53 | 81.72 (17.25) | 53 | 91.45 (13.71) | | 51 | 91.60 (10.52) | | 0.0006 |
| Emotional functioning subscale | 160 | 87.19 (16.43) | 54 | 82.13 (18.42) | 54 | 89.72 (15.94) | | 52 | 89.81 (13.57) | | 0.0253 |
| Social functioning subscale | 161 | 87.36 (17.51) | 54 | 87.78 (15.86) | 54 | 87.68 (18.78) | | 53 | 86.60 (18.07) | | 0.9385 |
| School functioning subscale | 152 | 84.24 (19.80) | 51 | 74.51 (22.05) | 50 | 87.90 (17.32) | | 51 | 90.39 (15.93) | | <0.0001 |
| Combined Quality of Life Score | 148 | 86.90 (13.52) | 50 | 81.87 (14.70) | 49 | 88.99 (14.15) | | 49 | 89.95 (9.96) | | 0.0045 |
| **Multi-dimensional Vigor Scale** |  |  |  |  |  |  | |  |  | |  |
| General vigor subscale | 157 | 84.08 (21.20) | 56 | 77.08 (25.56) | 51 | 86.27 (18.43) | | 50 | 89.67 (16.07) | | 0.0057 |
| Sleep vigor subscale | 158 | 88.45 (17.25) | 56 | 81.62 (20.05) | 52 | 90.30 (15.74) | | 50 | 94.17 (12.40) | | 0.0004 |
| Cognitive vigor subscale | 155 | 85.23 (21.07) | 56 | 75.45 (25.35) | 50 | 84.00 (18.89) | | 49 | 88.18 (15.22) | | 0.0059 |
| Multi-dimensional vigor score | 154 | 84.76 (17.60) | 56 | 78.05 (20 .62) | 49 | 86.65 (16.36) | | 49 | 90.56 (11.91) | | 0.0007 |
| **General Wellbeing Scale** |  |  |  |  |  |  | |  |  | |  |
| Wellbeing Index | 119 | 78.29 (11.53) | 45 | 73.18 (12.33) | 38 | 80.00 (11.47) | | 36 | 82.87 (07.73) | | 0.0003 |
| Self-Rated Health | 124 | 62.74 (17.55) | 48 | 58.75 (19.09) | 39 | 64.61 (15.53) | | 37 | 65.95 (16.91) | | 0.1245 |
| **Present Functioning Impairment** | 121 | 15.86 (15.01) | 46 | 18.94 (15.99) | 39 | 14.17 (13.93) | | 36 | 13.74 (14.59) | | 0.2098 |
| **General Cognitive Function** | 160 | 83.59 (20.77) | 52 | 73.80 (25.48) | 55 | 89.85 (16.80) | | 53 | 86.71(15.57) | | <0.0001 |

Wellbeing Index: composite of respondent rating of index child’s feelings of happiness, good feelings about self, their current and future health, future positive outlook and extent of support received from family or friends

| Table S3: Association between perinatal HIV status and deficits in proxy-reported quality of life measures during School-age and Adolescence in Ugandan children * | | | | | |
| --- | --- | --- | --- | --- | --- |
| Quality Of Life Dimension/Scale | **Perinatally HIV-infected vs perinatally HIV-exposed uninfected** | | **Perinatally HIV-infected vs Healthy unexposed uninfected** | **Perinatally HIV-exposed uninfected vs Healthy unexposed uninfected** | ***R2*** |
| Quality of Life Inventory Scale | **Beta (95%CI)** | | **Beta (95%CI)** | **Beta (95%CI)** |  |
| Physical functioning subscale | -12.13 (-17.82, -6.44) | -10.29 (-16.66, -3.92) | | 1.85 (-3.75, 7.43) | 0.29 |
| Emotional functioning subscale | -10.66 (-17.65, -3.67) | -6.19 (-13.32, 0.93) | | 4.47 (-2.45, 11.38) | 0.25 |
| Social functioning subscale | -1.13 (-6.84, 4.59) | -2.35 (-8.26, 3.56) | | 1.22 (-7.44, 4.99) | 0.28 |
| School functioning subscale | -16.23 (-25.84, -6.63) | -17.08 (-26.42, -7.75) | | -0.85 (-9.11, 7.41) | 0.17 |
| Combined Quality of Life Score | -9.92 (-15.47, -4.40) | -9.22 (-15.37, -3.07) | | 0.70 (-4.90, 6.31) | 0.28 |
| Multi-dimensional Vigor Scale |  |  | |  |  |
| General vigor subscale | -12.25 (-21.03, -3.48) | -13.28 (-21.74, -4.82) | | -1.03 (-9.32, 7.26) | 0.24 |
| Sleep vigor subscale | -1.95 (-7.46, 3.55) | 2.05 (-4.92, 9.02) | | 4.00 (-2.69, 10.70) | 0.14 |
| Cognitive vigor subscale | -11.58 (-23.19, 0.04) | -11.50 (-22.83, -0.18) | | 0.07 (-11.53, 11.68) | 0.11 |
| Multi-dimensional vigor score | -7.82 (-15.56, -0.07) | -6.81 (-14.48, 0.86) | | 1.01 (-6.48, 8.49) | 0.22 |
| General Wellbeing Scale |  |  | |  |  |
| Wellbeing Index | -6.77 (-14.26, 0.72) | -10.51 (-16.02, -5.01) | | -3.74 (-11.57, 4.08) | 0.26 |
| Self-Rated Health | -10.76 (-16.12, -5.40) | -4.25 (-9.39, 0.90) | | 6.52 (0.62, 12.41) | 0.08 |
| Present Functioning Impairment | 10.77 (3.78, 17.76) | 8.50 (1.68, 15.31) | | -2.27 (-8.97, 4.43) | 0.19 |
| General Cognitive Function | -13.80 (-25.67,-1.93) | -13.12 (-24.88, -1.36) | | 0.68 (-10.20, 11.56) | 0.13 |
| All estimates are derived from a GEE linear regression model with respective quality of life dimensions as linear outcome variable. Estimates shown are from models adjusted for the following potential confounders: child’s, age, sex, child’s relationship to caregiver, child nutritional status, caregiver’s BMI, caregiver’s age, caregiver’s education level | | | | | |

| Table S4: Association between perinatal HIV status and deficits in **self-reported** quality of life **measures** during School-age and Adolescence in Ugandan children with and without Perinatal HIV-infection/Exposure* | | | | |
| --- | --- | --- | --- | --- |
| **Quality Of Life Dimension** | **Perinatally HIV-infected vs perinatally HIV-exposed uninfected** | **Perinatally HIV-infected vs Healthy unexposed uninfected** | **Perinatally HIV-exposed uninfected vs Healthy unexposed uninfected** | ***R2*** |
| **Combined Quality of Life Scale** | **Beta (95%CI)** | **Beta (95%CI)** | **Beta (95%CI)** |  |
| Physical functioning subscale | -7.99 (-14.20, -1.77) | -8.54 (-14.41, -2.66) | -0.55 (-6.85, 5.76) | 0.12 |
| Emotional functioning subscale | -5.56 (-13.77, 2.65) | -6.92 (-13.56, -0.28) | -1.36 (-9.20, 6.48) | 0.14 |
| Social functioning subscale | -1.20 (-7.81, 5.42) | -0.30 (-5.66, 6.26) | 1.50 (-4.60, 7.60) | 0.22 |
| School functioning subscale | -11.76 (-18.90, -4.63) | -11.41 (-19.14, -3.68) | -0.36 (-8.30, 9.01) | 0.14 |
| Combined QOL Score | -6.26 (-11.73, -0.80) | -6.53 (-11.46, -1.60) | -0.27 (-6.16, 5.63) | 0.14 |
| **Multi-dimensional Vigor Scale** |  |  |  |  |
| General vigor subscale | -7.66 (-16.20, 0.88) | -9.24 (-17.66, -0.83) | -1.58 (-11.25, 8.09) | 0.07 |
| Sleep vigor subscale | -12.95 (-20.00, -5.89) | -13.10 (-19.43, -6.77) | -0.15 (-5.99, 5.69) | 0.14 |
| Cognitive vigor subscale | -8.64 (-18.57, 1.29) | -12.57 (-21.18, -3.96) | -3.93 (-13.53, 5.66) | 0.08 |
| Multi-dimensional vigor score | -9.37 (-16.90, -1.85) | -11.60 (-18.13, -5.08) | -2.23 (-9.42, 4.97) | 0.10 |
| **General Wellbeing** **Scale** |  |  |  |  |
| Wellbeing Index | -3.51 (-8.98, 1.95) | -6.45 (-11.58, -1.31) | -2.93 (-8.00, 2.13) | 0.12 |
| Self-Rated Health | -5.20 (-13.34, 2.95) | -10.34 (-18.60, -2.08) | -5.14 (-13.77, 3.49) | 0.10 |
| **Present Functioning Impairment** | 2.69 (-5.18, 10.55) | 3.96 (-4.60, 12.51) | 1.27 (-8.83, 11.37) | 0.09 |
| **General Cognitive Function** | -11.30 (-19.83, -2.78) | -9.74 (-18.14, -1.33) | 1.57 (-7.53, 10.66) | 0.16 |
| All estimates are derived from a GEE linear regression model with respective quality of life dimensions as linear outcome variable. Estimates shown are from models adjusted for the following potential confounders: child’s, age, sex, child’s relationship to caregiver, child nutritional status, caregiver’s BMI, caregiver’s age, caregiver’s education level | | | | |
